# Supplementary material
Source: HighWire-hosted journal article supplement (https://openheart.bmj.com/content/3/1/e000366)
Supplement: inline-supplementary-material-1 [file inline-supplementary-material-1.pdf]

## **Supplementary file**

### **Methods**

#### **Measurements**

##### ***--Body fluid balance and body composition***

The body composition of each participant was examined using a bioelectrical impedance analysis (BIA) instrument (Inbody s20, BIOSPACE, Seoul, South Korea) in the morning after polysomnography at baseline and follow-up. This was also after a 12 hour fast. This is a multi-frequency impedance plethysmograph body composition analyser, which takes readings from the body using eight-point tactile electrodes, of which two are in contact with the thumb and middle finger of each hand, and two are in contact with the bilateral sides of the ankle joint of each foot. After resistance was measured at five specific frequencies (1kHz, 50kHz, 250kHz, 500kHz, and 1MHz), the amount of total body water and extracellular water were estimated from these data. Fat mass and lean fat mass were estimated by total body water through proprietary algorithms. Participants were instructed to recline for at least 5 minutes before analysis and to lie quietly during analysis.

To confirm the reproducibility of the data, we measured the above parameters three times in 10 minutes (each measurement required 1–2 minutes) for every participant and calculated intra-class correlation coefficient (ICC) values for all variables measured. The ICC values for agreement were greater than 0.99 for all parameters measured. For all parameters, we adopted the average value of the last two measurements for data analysis.

Supplementary table 1. Sleep parameters at baseline and after three months of therapy: full analysis

set.

|                                       | ASV (n=19) | Oxygen (n=21) | p*   |
|---------------------------------------|------------|---------------|------|
| Total sleep time, m                   |            |               |      |
| Baseline                              | 325.8±72.7 | 320.5±64.1    | 0.81 |
| 3 months                              | 337.2±53.4 | 342.9±62.9    |      |
| Δ                                     | 11.4±61.9  | 22.4±67.4     | 0.59 |
| Obstructive aponea hypopnea index, /h |            |               |      |
| Baseline                              | 5.4±5.2    | 10.1±10.3     | 0.26 |
| 3 months                              | 0.9±1.5†   | 7.1±7.1       |      |
| Δ                                     | -4.5±6.0   | -3.0±8.9      | 0.55 |
| Central aponea hypopnea index, /h     |            |               |      |
| Baseline                              | 28.8±12.9  | 26.8±11.8     | 0.60 |
| 3 months                              | 6.3±5.2†   | 12.3±7.7†     |      |
| Δ                                     | -22.6±11.1 | -14.5±11.1    | 0.03 |
| Time SpO <sub>2</sub> <90%, m         |            |               |      |
| Baseline                              | 41.4±63.8  | 60.0±52.7     | 0.11 |
| 3 months                              | 0.8±1.6†   | 3.3±7.0†      |      |
| Δ                                     | -40.6±63.3 | -56.7±64.4    | 0.43 |
| Arousal Index, /h                     |            |               |      |
| Baseline                              | 42.3±2.2   | 36.7±12.6     | 0.33 |
| 3 months                              | 27.7±15.6† | 24.2±9.5†     |      |
| Δ                                     | -14.6±14.7 | -12.5±14.4    | 0.66 |

Values are expressed as mean ± standard deviation.

\* p value for comparisons of changes in the parameters between the two groups.

† p<0.05 vs baseline within the same group.

Supplementary table 2. Clinical background of study participants : per protocol analysis set.

|                                         | ASV (n=15)       | Oxygen (n=18)    | p    |
|-----------------------------------------|------------------|------------------|------|
| Male, n(%)                              | 13 (86.7)        | 14 (77.8)        | 0.67 |
| Age, y                                  | 67±10            | 71±6             | 0.32 |
| Body mass index, kg/m <sup>2</sup>      | 23.1±3.1         | 24.4±2.3         | 0.16 |
| NYHA classification (I/II/III), n       | 0/10/5           | 1/13/4           | 0.50 |
| Main etiology of heart failure          |                  |                  |      |
| Old myocardial infarction, n(%)         | 6 (40.0)         | 10 (55.6)        |      |
| Dilative cardiomyopathy, n(%)           | 9 (60.0)         | 6 (33.3)         |      |
| Hypertrophic cardiomyopathy, n(%)       | 0 (0)            | 1 (5.6)          |      |
| Sarcoidosis, n(%)                       | 0 (0)            | 1 (5.6)          | 0.25 |
| History of atrial fibrillation, n(%)    | 3 (20.0)         | 3 (16.7)         | 1.00 |
| Medication                              |                  |                  |      |
| β-blocker, n(%)                         | 12 (80.0)        | 16 (88.9)        | 0.64 |
| Diuretics, n(%)                         | 7 (46.7)         | 8 (44.4)         | 0.90 |
| Ca-blocker, n(%)                        | 2 (13.3)         | 3 (16.7)         | 1.00 |
| ACEI/ARB, n(%)                          | 11 (73.3)        | 15 (83.3)        | 0.67 |
| Amiodarone, n(%)                        | 2 (13.3)         | 1 (5.6)          | 0.58 |
| Implanted biventricular pacemaker or    | 4 (26.7)         | 3 (16.7)         | 0.67 |
| NT-proBNP, pg/ml                        | 583 (319 - 1720) | 447 (215 - 1046) | 0.21 |
| Apnea hypopnea index, /h                | 34.4±13.3        | 38.2±9.5         | 0.34 |
| Central / Total aponea hyponea index, % | 81.4±16.7        | 71.7±27.7        | 0.24 |
| 3% oxygen desaturation index, /h        | 29.5±14.9        | 34.2±11.4        | 0.32 |

Values are expressed as mean ± standard deviation or median (1<sup>st</sup> quartile – 3<sup>rd</sup> quartile).

ASV, Adaptive servo ventilation; NYHA, New York Heart Association; ACEI, angiotensin

converting enzyme inhibitor; ARB, angiotensin receptor blocker;

NT-proBNP, N-terminal-pro-B-type natriuretic peptide.

Supplementary table 3. Echocardiographic parameters at baseline and three months follow-up: per protocol analysis.

|                                             | ASV (n=15)  | Oxygen (n=18) | p*   |
|---------------------------------------------|-------------|---------------|------|
| Left ventricular ejection fraction, %       |             |               |      |
| Baseline                                    | 35.8±10.8   | 38.0±9.3      | 0.53 |
| 3 months                                    | 36.3±12.9   | 39.2±10.5     |      |
| Δ                                           | 0.5±4.7     | 1.1±5.1       | 0.69 |
| Left ventricular end-diastolic diameter, mm |             |               |      |
| Baseline                                    | 60.0±9.4    | 60.0±7.7      | 0.97 |
| 3 months                                    | 59.7±9.2    | 59.7±9.5      |      |
| Δ                                           | -0.2±2.7    | -0.4±3.1      | 0.87 |
| Left ventricular end-systolic diameter, mm  |             |               |      |
| Baseline                                    | 49.9±10.8   | 50.0±10.0     | 0.96 |
| 3 months                                    | 49.3±11.5   | 49.1±12.5     |      |
| Δ                                           | -0.6±2.7    | -0.9±4.0      | 0.81 |
| Left ventricular end-diastolic volume, ml   |             |               |      |
| Baseline                                    | 177.7±63.0  | 151.8±59.7    | 0.24 |
| 3 months                                    | 170.7±54.7† | 164.4±77.5    |      |
| Δ                                           | -7.1±13.9   | 12.6±31.4     | 0.04 |
| Left ventricular end-systolic volume, ml    |             |               |      |
| Baseline                                    | 115.0±61.9  | 98.8±56.9     | 0.44 |
| 3 months                                    | 112.8±55.4  | 105.3±65.0    |      |
| Δ                                           | -2.2±12.1   | 6.4±23.6      | 0.21 |
| Left atrium diameter, mm                    |             |               |      |
| Baseline                                    | 44.6±7.1    | 45.7±6.7      | 0.64 |
| 3 months                                    | 45.7±6.6    | 46.0±5.6      |      |
| Δ                                           | 1.1±2.6     | 0.3±3.4       | 0.47 |

Values are expressed as mean ± standard deviation.

ASV, adaptive servo ventilation.

\* p value for comparison between ASV and oxygen groups.

† p<0.10 vs baseline within the same group.

Supplementary table 4. Sleep parameters at baseline and after three months of therapy: per protocol

analysis set.

|                                       | ASV (n=15) | Oxygen (n=18) | p*   |
|---------------------------------------|------------|---------------|------|
| Total sleep time, m                   |            |               |      |
| Baseline                              | 333.8±74.7 | 324.8±67.4    | 0.72 |
| 3 months                              | 344.1±53.8 | 350.9±63.3    |      |
| Δ                                     | 10.2±66.3  | 26.1±68.7     | 0.51 |
| Obstructive aponea hypopnea index, /h |            |               |      |
| Baseline                              | 5.9±5.6    | 11.0±10.9     | 0.11 |
| 3 months                              | 0.7±1.3†   | 7.8±7.5       |      |
| Δ                                     | -5.2±6.3   | -3.2±9.6      | 0.49 |
| Central aponea hypopnea index, /h     |            |               |      |
| Baseline                              | 28.5±14.3  | 27.3±12.1     | 0.78 |
| 3 months                              | 6.7±5.7†   | 11.7±7.1†     |      |
| Δ                                     | -21.8±12.1 | -15.5±11.7    | 0.14 |
| Time SpO <sub>2</sub> <90%, m         |            |               |      |
| Baseline                              | 36.1±53.5  | 49.3±52.2     | 0.48 |
| 3 months                              | 0.8±1.7†   | 3.7±7.5†      |      |
| Δ                                     | -35.3±52.6 | -45.6±54.2    | 0.58 |
| Arousal Index, /h                     |            |               |      |
| Baseline                              | 41.4±20.6  | 37.6±12.6     | 0.52 |
| 3 months                              | 28.7±16.1† | 24.0±10.0†    |      |
| Δ                                     | -12.7±14.0 | -13.5±15.1    | 0.87 |

Values are expressed as mean ± standard deviation.

\* p value for comparisons of changes in the parameters between the two groups.

† p<0.05 vs baseline within the same group.

Supplementary table 5. Cardiac parameters at baseline and after three months of therapy: per protocol analysis set.

|                                | ASV (n=15)  | Oxygen (n=18) | p*   |
|--------------------------------|-------------|---------------|------|
| Systolic blood pressure, mmHg  |             |               |      |
| Baseline                       | 125.3±16.9  | 120.2±16.4    | 0.39 |
| 3 months                       | 118.9±16.3† | 118.4±13.4    |      |
| Δ                              | -6.3±10.3   | -1.7±15.5     | 0.33 |
| Diastolic blood pressure, mmHg |             |               |      |
| Baseline                       | 70.1±8.4    | 69.1±9.6      | 0.74 |
| 3 months                       | 68.5±11.0   | 67.9±9.2      |      |
| Δ                              | -1.7±9.9    | -1.2±13.7     | 0.91 |
| Heart rate, /m                 |             |               |      |
| Baseline                       | 63.3±11.5   | 67.4±10.2     | 0.28 |
| 3 months                       | 60.9±11.5   | 70.7±12.8     |      |
| Δ                              | -2.4±7.7    | 3.2±11.0      | 0.11 |
| 6MWD, m                        |             |               |      |
| Baseline                       | 478±86      | 456±76        | 0.47 |
| 3 months                       | 474±118     | 468±78‡       |      |
| Δ                              | -4±40       | 12±25         | 0.21 |
| MLHFQ score                    |             |               |      |
| Baseline                       | 25.9±20.9   | 24.4±20.1     | 0.84 |
| 3 months                       | 18.7±17.6‡  | 19.2±16.3‡    |      |
| Δ                              | -7.2±15.0   | -5.3±12.4     | 0.69 |

Values are expressed as mean ± standard deviation.

ASV, adaptive servo ventilation; 6MWD, 6 minutes walking distance; MLHFQ, Minnesota Living with Heart Failure Questionnaire.

\* p value for comparison between ASV and oxygen group.

† p<0.05 vs baseline within the same group.

‡ p<0.10 vs baseline within the same group.

Supplementary table 6. Changes in body composition measured by bioimpedance analyser: per protocol

analysis set

|                                           | ASV (n=11) | Oxygen (n=15) | p*    |
|-------------------------------------------|------------|---------------|-------|
| Body mass index, kg/m <sup>2</sup>        |            |               |       |
| Baseline                                  | 23.1±3.3   | 24.8±2.1      | 0.03  |
| 3 months                                  | 23.8±3.2†  | 24.8±2.2      |       |
| Δ                                         | 0.7±0.8    | 0.0±0.4       | <0.01 |
| Total body water, l                       |            |               |       |
| Baseline                                  | 34.1±5.9   | 34.1±5.0      | 0.98  |
| 3 months                                  | 34.6±5.7   | 34.1±5.1      |       |
| Δ                                         | 0.5±0.8    | 0.0±0.7       | 0.16  |
| Extra cellular water, l                   |            |               |       |
| Baseline                                  | 13.1±2.1   | 13.2±1.9      | 0.87  |
| 3 months                                  | 13.3±2.1   | 13.2±2.0      |       |
| Δ                                         | 0.2±0.3    | 0.0±0.3       | 0.13  |
| Extracellular water/ Total body water , % |            |               |       |
| Baseline                                  | 38.3±0.4   | 38.8±0.9      | 0.15  |
| 3 months                                  | 38.4±0.4   | 38.8±0.9      |       |
| Δ                                         | 0.0±0.0    | 0.0±0.0       | 0.64  |
| Fat mass, kg                              |            |               |       |
| Baseline                                  | 16.5±6.9   | 20.3±3.8      | 0.02  |
| 3 months                                  | 17.7±6.6†  | 20.2±4.2      |       |
| Δ                                         | 1.2±1.7    | -0.1±1.0      | 0.03  |
| Lean fat mass, kg                         |            |               |       |
| Baseline                                  | 46.3±8.0   | 46.2±6.8      | 0.97  |
| 3 months                                  | 47.0±7.9   | 46.2±6.9      |       |
| Δ                                         | 0.7±1.1    | -0.0±0.9      | 0.10  |

Values are expressed as mean ± standard deviation.

ASV, adaptive servo ventilation.

\* p value for comparison between ASV and oxygen group.

† p<0.05 vs baseline within the same group.

—■— Adaptive servo ventilation (n=15)  
.....▲..... Nocturnal oxygen therapy (n=18)

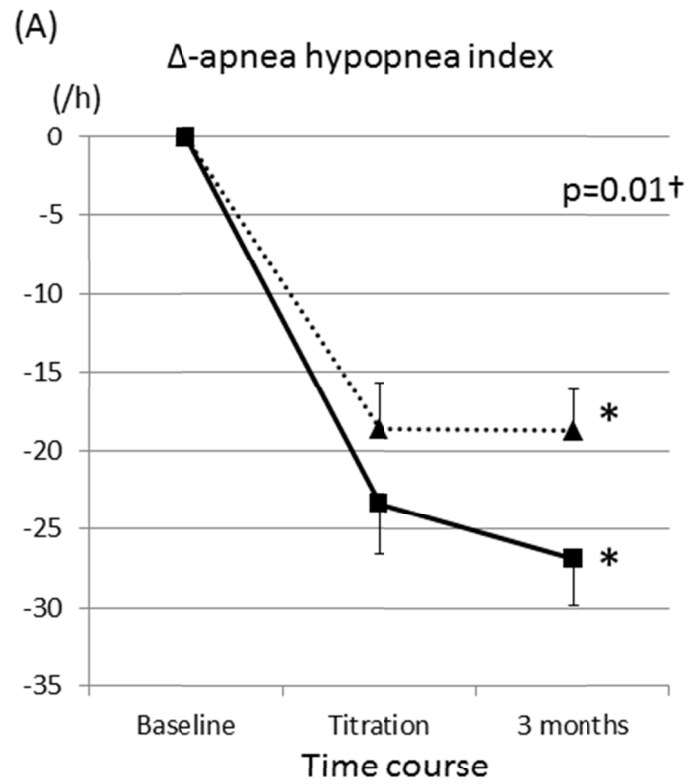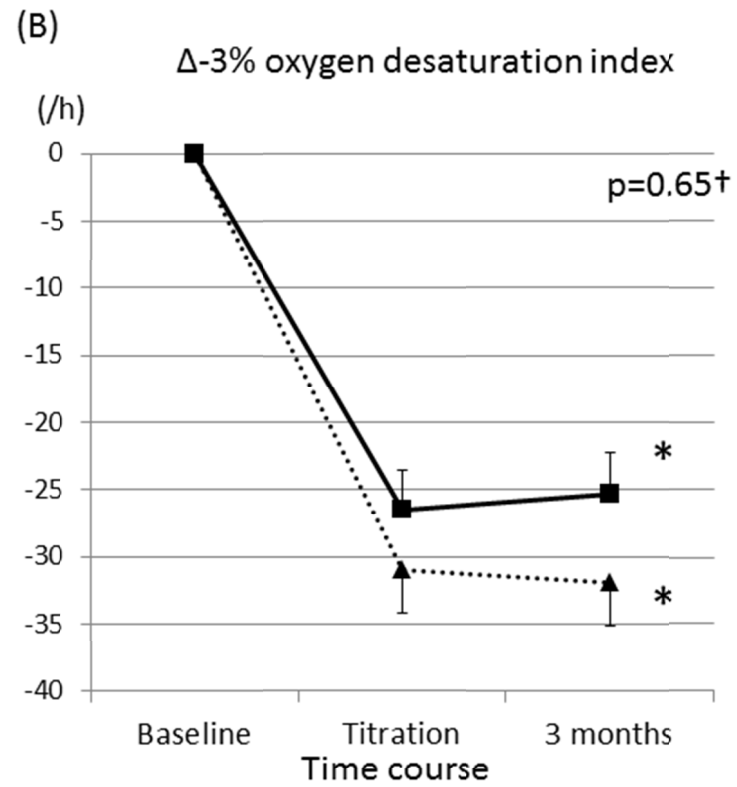

Supplementary figure 1



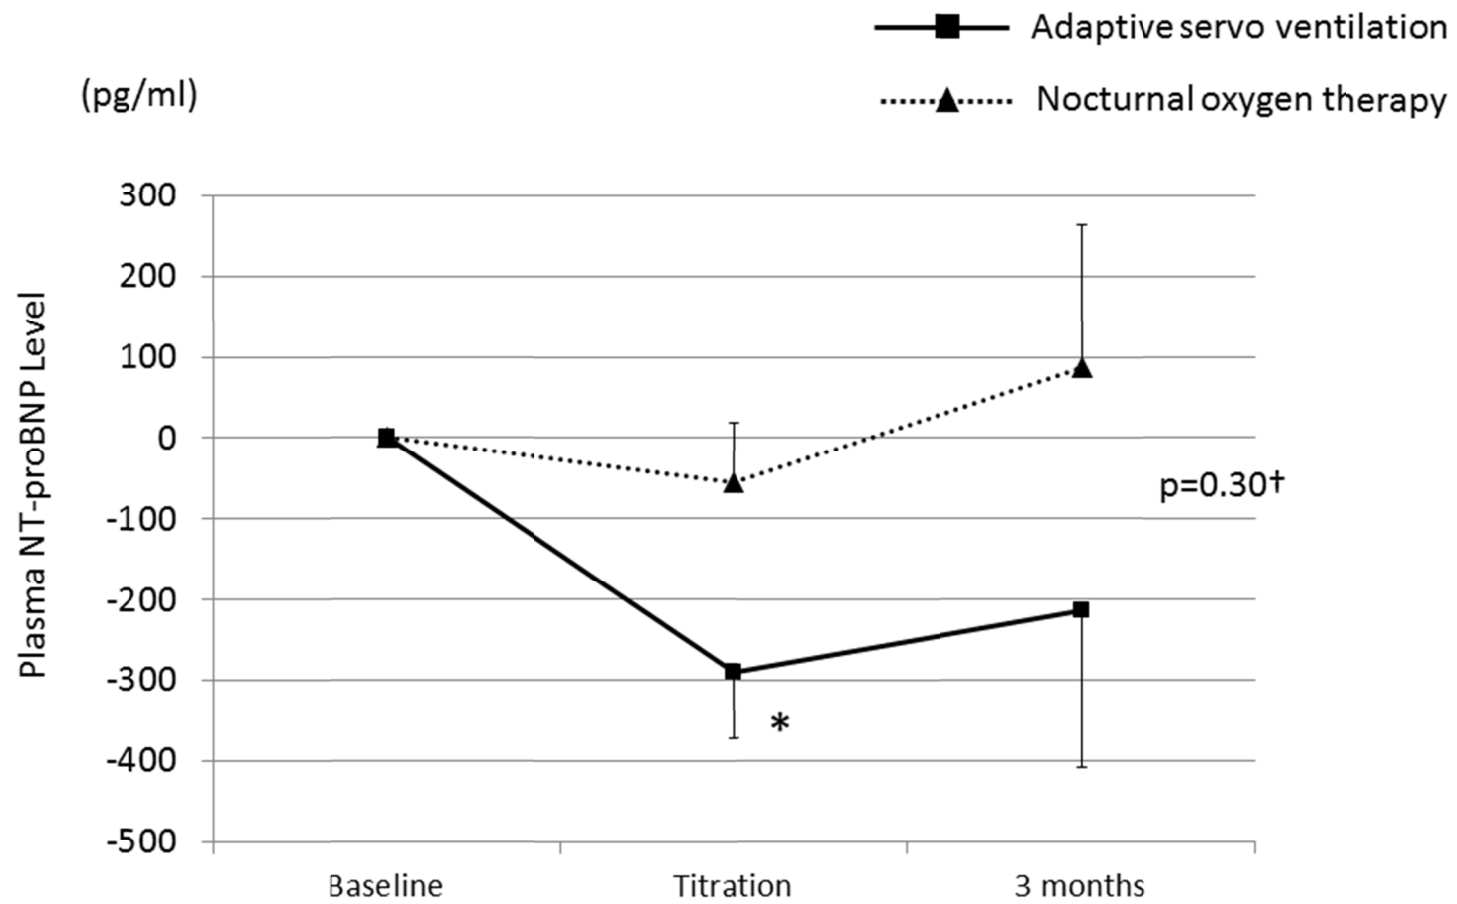

Supplementary figure 2.

### Supplementary figure legend

Supplementary figure 1. (A) and (B). Changes in apnea hypopnea index (AHI) and 3% oxygen desaturation index (ODI) from baseline to treatment titration and three months of therapy: per protocol analysis set. Plotted line graphs indicate the mean  $\pm$  standard error at each assessment.

\* One-way repeated measure analyses of variance (ANOVA) showed that both ASV and oxygen therapy significantly decreased AHI (ASV: baseline  $34.4 \pm 13.3$ , titration  $11.0 \pm 11.4$ , follow-up  $7.4 \pm 6.6/h$ ,  $p < 0.01$ ; oxygen: baseline  $38.2 \pm 9.5$ , titration  $19.6 \pm 11.4$ , follow-up  $19.5 \pm 8.3/h$ ,  $p < 0.01$ ) and 3% ODI (ASV: baseline  $29.5 \pm 14.9$ , titration  $3.0 \pm 2.5$ , follow-up  $4.2 \pm 4.5/h$ ,  $p < 0.01$ ; oxygen: baseline  $34.2 \pm 11.4$ , titration  $3.1 \pm 5.4$ , follow-up  $2.3 \pm 5.5/h$ ,  $p < 0.01$ ) within the same group.

† Two-way measured ANOVA showed that a significant difference was found in the changes in AHI ( $p = 0.01$ ) but not in 3% ODI ( $p = 0.65$ ) throughout the study between two groups.

Supplementary figure 2. Changes in plasma N-terminal pro-B-type natriuretic peptide (NT-proBNP) level from baseline to treatment titration and three months of therapy: per protocol analysis set. Plotted line graphs indicate the mean  $\pm$  standard error at each assessment. The changes in NT-proBNP level throughout the study were compared by one-way and two-way repeated measure analyses of variance with post-hoc pairwise comparison within the same group and between two groups, respectively, after NT-proBNP values were log-transformed .

\* In the ASV group, the plasma NT-proBNP level significantly decreased from baseline to titration ( $1570 \pm 2487$  to  $1279 \pm 2234$  pg/ml,  $p < 0.01$ ). At three months, it increased slightly and its change from baseline did not reach statistical significance ( $1355 \pm 1757$  pg/ml,  $p = 0.29$ ). On the other hand, the oxygen group did not show a significant change throughout the study (baseline  $1067 \pm 1962$ , titration  $1012 \pm 2038$ , follow-up  $1154 \pm 2007$  pg/ml,  $p = 0.16$ ).

† The difference in the change in NT-proBNP throughout the study between the two groups did not

reach statistical significance ( $p=0.30$ ).
